# Supplementary material for: Efficient cationic dye removal from water through Arachis hypogaea skin-derived carbon nanospheres: a rapid and sustainable approach
Source: Royal Society of Chemistry journal article supplement (doi:10.1039/d4na00254g), 2024-01-01
Supplement: d4na00254g1.pdf [file d4na00254g1.pdf]

# Efficient Cationic Dye Removal in Water through *Arachis hypogaea* Skin-Derived Carbon Nanospheres: A Rapid and Sustainable Approach

Aman Sharma et al.,

Supplementary information:

|                                    | Mean (mV)            | Area (%) | St Dev (mV) |
|------------------------------------|----------------------|----------|-------------|
| <b>Zeta Potential (mV): -19.2</b>  | <b>Peak 1: -19.2</b> | 100.0    | 5.78        |
| <b>Zeta Deviation (mV): 5.78</b>   | <b>Peak 2: 0.00</b>  | 0.0      | 0.00        |
| <b>Conductivity (mS/cm): 0.119</b> | <b>Peak 3: 0.00</b>  | 0.0      | 0.00        |

**Result quality Good**

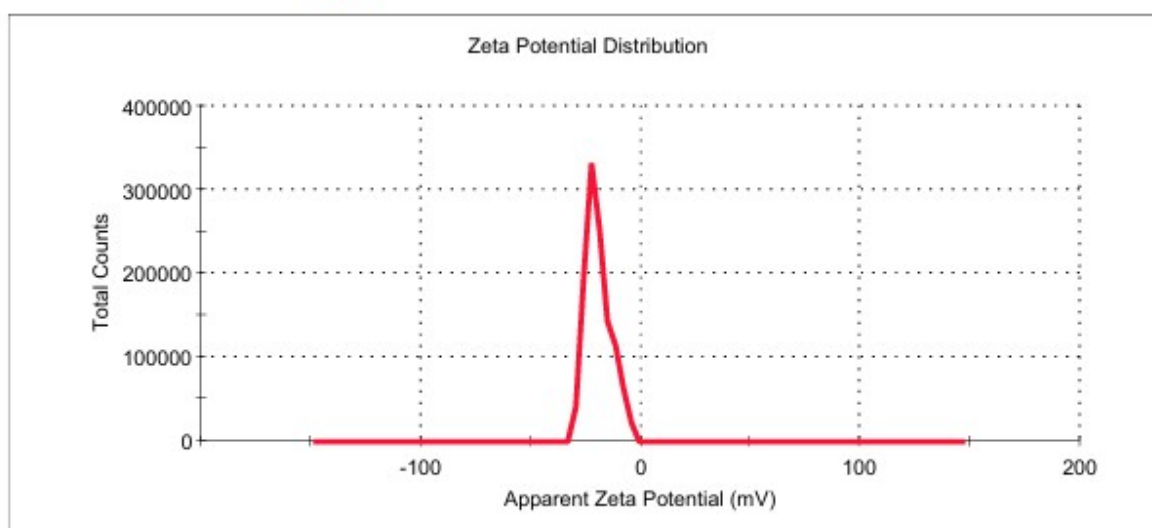

S1: Zeta potential curve for GS-CNS

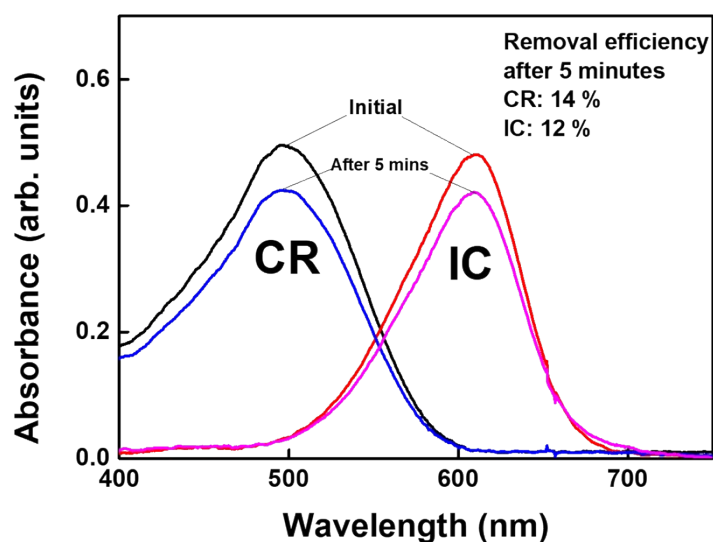

S2: a) Removal efficiency for Indigo Carmine (IC) and Congo Red (CR) with 10 mg/L dye concentration

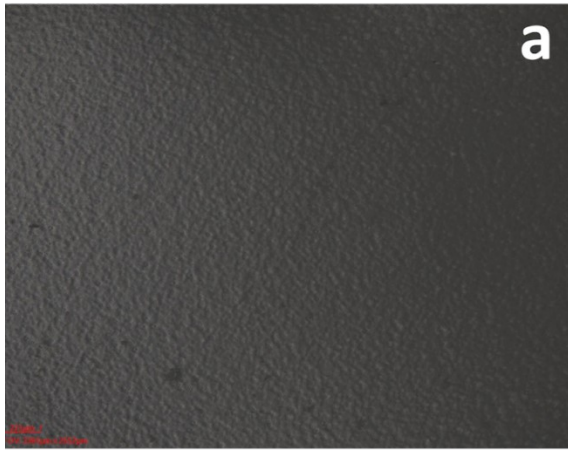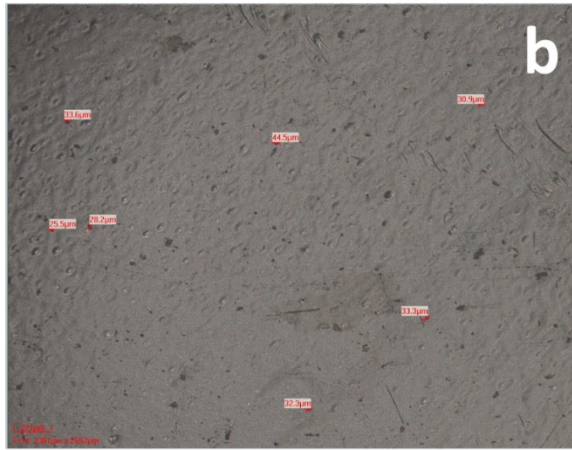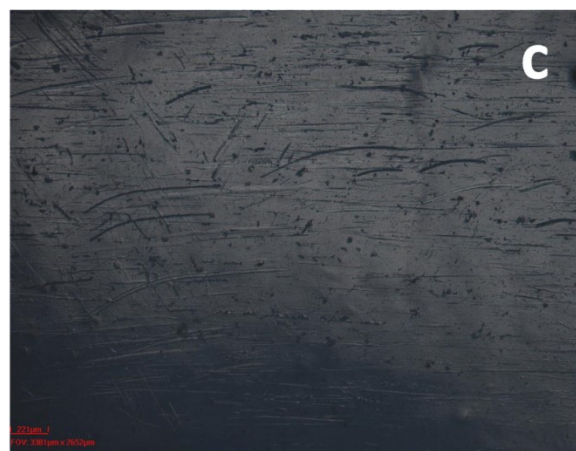

**S3:** Optical Profilometry 2D- image of a) Pure Polysulfone membrane, b) GS-CNSs polysulfone membrane, and c) GS-CNSs membrane after dye adsorption

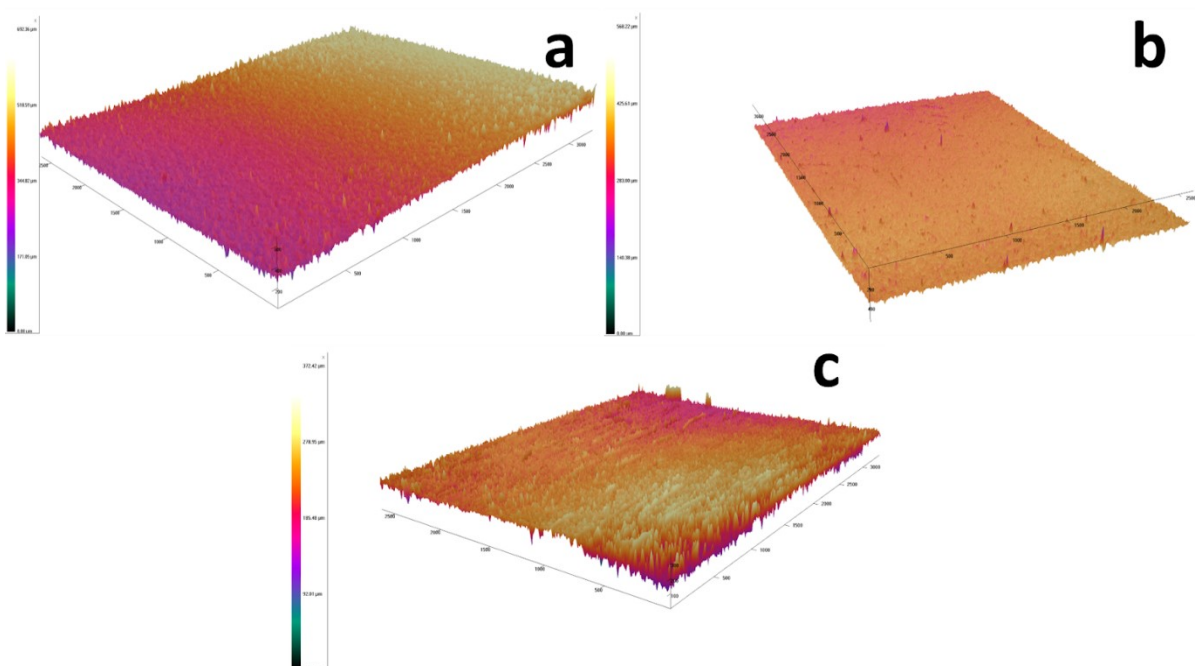

**S4:** Optical Profilometry 3D- image of a) Pure polysulfone membrane, b) GS-CNSs polysulfone membrane, and c) GS-CNSs membrane after dye adsorption
